# Supplementary material for: MicroRNA-31 suppresses medulloblastoma cell growth by inhibiting DNA replication through minichromosome maintenance 2
Source: PubMed Central journal article supplement (PMC4148102; doi:10.18632/oncotarget.2043), 2014-05-30
Supplement: oncotarget-05-4821-s003.pdf [file oncotarget-05-4821-s003.pdf]

# MicroRNA-31 suppresses medulloblastoma cell growth by inhibiting DNA replication through minichromosome maintenance 2

## Supplementary Material

**Supplementary Table 3 Primer sequences used for vector construct.**

| Primer Name                | Sequence(5'-3')                      |
|----------------------------|--------------------------------------|
| pre-miR-31-F(BamHI)        | GAAGGATCCTAGTATTCTCCTGTAACCTGGAAC    |
| pre-miR-31-R(XhoI)         | ATACTCGAGGGACTGGCATGCAGGTGGCCATGG    |
| pGl3-MCM2-3'UTR-F          | GCTCTAGAGGGTACTAGGGTCAGGGCTTAT       |
| pGl3-MCM2-3'UTR-R          | GCTCTAGAACCAAACCGAATGCACAAAT         |
| pGl3-MCM2-3'UTR-Mutant 1-F | GGGTGGGATGCCTTCGGAGTGTGTCTTACTTGG    |
| pGl3-MCM2-3'UTR-Mutant 1-R | CCAAGTAAGACACACTCCGAAGGCATCCCACCC    |
| pGl3-MCM2-3'UTR-Mutant 2-F | GGTTGCTGAACATGTTTCGGACCTCCGAGTGCTTTG |
| pGl3-MCM2-3'UTR-Mutant 2-R | CAAAGCACTCGGAGGTCCGAACATGTTTCAGCAACC |

**Supplementary Table 4 Primer sequences used for RT-PCR and quantification RT-PCR.**

| Primer Name                 | Sequence(5'-3')                                        |
|-----------------------------|--------------------------------------------------------|
| miRNA reverse primer        | GTGCAGGGTCCGAGGT                                       |
| mmu-miR-31 stem-loop primer | GTCGTATCCAGTGCAGGGTCCGAGGTATTCGCACTGG<br>ATACGACAGCTAT |
| hsa-miR-31 stem-loop primer | GTCGTATCCAGTGCAGGGTCCGAGGTATTCGCACTGG<br>ATACGACCAGCTA |
| hsa/mmu-miR-31-F            | AGCCGAGGCAAGATGCTGGCA                                  |
| hsa/mmu-U6-F                | CTCGCTTCGGCAGCACATATAAC                                |
| hsa/mmu-U6-R                | GAACGCTTCACGAATTTGCGTG                                 |
| hsa-CDK1-F                  | GGGTAGACACAAAACACTACAGGTC                              |
| hsa-CDK1-R                  | TCCTGCATAAGCACATCCTGA                                  |
| hsa-CDK2-F                  | CCCAGATGAGGTGGTGTGG                                    |
| hsa-CDK2-R                  | CCGCTTGTTAGGGTCGTAGTG                                  |

|             |                        |
|-------------|------------------------|
| hsa-CDK4-F  | CTGGTGTTTGAGCATGTAGACC |
| hsa-CDK4-R  | AAACTGGCGCATCAGATCCTT  |
| hsa-MCM2-F  | CCGTGACCTTCCACCATTGA   |
| hsa-MCM2-R  | GGTAGTCCCTTTCATGCCAT   |
| hsa-CDC6-F  | GCTGTTGAACTTCCCACCTT   |
| hsa-CDC6-R  | TTGCGAACATCTCCTGAAAC   |
| hsa-MCM6-F  | CTGCTGTGATGAGGTCCAAC   |
| hsa-MCM6-R  | GCACCCTCATCTACCTCCAT   |
| hsa-GAPDH-F | ATCATCCCTGCCTCTACTGG   |
| hsa-GAPDH-R | GTCAGGTCCACCACTGACAC   |

**Supplementary Table 5 Primer sequences used for mapping deletions in 9p21.3.**

| <b>Primer Name</b>       | <b>Sequence(5'-3')</b>  |
|--------------------------|-------------------------|
| p16 <sup>CDKN2A</sup> -F | GAATCCCGTAGCTTCCCTAC    |
| p16 <sup>CDKN2A</sup> -R | CGGGTCCCGATTTAGAAGG     |
| 9p minus 1Mbps-F         | CCTGCTGTGCACTAGATCTC    |
| 9p minus 1Mbps-R         | AGGGCTCCCACTGATTCTG     |
| 9p plus 1Mbps-F          | GTTATGCTGCATTCCAGATGG   |
| 9p plus 1Mbps-R          | GTAATGCTTCCAGGTCTATGC   |
| CDK1-F                   | GTTTCCATATGTTATATCAACAG |
| CDK1-R                   | GAGCCTTTTTAGATGGCTGCTAA |
